# Supplementary material for: Broadening of Virus-Specific CD8+ T-Cell Responses Is Indicative of Residual Viral Replication in Aviremic SIV Controllers
Source: PubMed Central journal article supplement (PMC4633064; doi:10.1371/journal.ppat.1005247), 2015-11-04
Supplement: ppat.1005247.s003.pdf [file ppat.1005247.s003.pdf]

**S1 Table. The number of CD4<sup>+</sup> T cells used for PCR amplification of proviral *gag* cDNA fragments for sequencing**

| Macaques | CD4 <sup>+</sup> T-cell numbers <sup>a</sup> |                       |                        |
|----------|----------------------------------------------|-----------------------|------------------------|
|          | 2 months pi                                  | 1 year pi             | 2 years pi             |
| R06-037  | 8.6 x 10 <sup>4</sup>                        | 1.8 x 10 <sup>5</sup> | *6.6 x 10 <sup>4</sup> |
| R05-005  | 6.2 x 10 <sup>4</sup>                        | 2.0 x 10 <sup>5</sup> | *9.4 x 10 <sup>4</sup> |
| R07-002  | 6.2 x 10 <sup>4</sup>                        | 1.3 x 10 <sup>5</sup> | 5.5 x 10 <sup>4</sup>  |
| R03-018  | 5.0 x 10 <sup>4</sup>                        | 1.1 x 10 <sup>5</sup> | 4.4 x 10 <sup>4</sup>  |
| R07-001  | 1.3 x 10 <sup>5</sup>                        | 2.2 x 10 <sup>5</sup> | *1.0 x 10 <sup>5</sup> |
| R07-006  | 5.5 x 10 <sup>4</sup>                        | 2.0 x 10 <sup>5</sup> | *1.0 x 10 <sup>5</sup> |
| R07-003  | 7.2 x 10 <sup>4</sup>                        | 1.8 x 10 <sup>5</sup> | 8.6 x 10 <sup>4</sup>  |
| R07-008  | 5.5 x 10 <sup>4</sup>                        | 4.4 x 10 <sup>5</sup> | 8.1 x 10 <sup>4</sup>  |
| R09-009  | 5.5 x 10 <sup>4</sup>                        | 1.1 x 10 <sup>5</sup> | 1.1 x 10 <sup>5</sup>  |
| R09-010  | 6.6 x 10 <sup>4</sup>                        | 1.7 x 10 <sup>5</sup> | 6.1 x 10 <sup>4</sup>  |

<sup>a</sup>PBMCs obtained from macaques at 2 months, 1 year, and 2 years post-infection (pi) were used. Cellular DNAs were extracted from CD4<sup>+</sup> T cells isolated from PBMCs and were used as the template for nested PCR amplification of proviral *gag* cDNA fragments for sequencing. The amount of DNA used as the template for the first PCR amplification is corresponding to that derived from the indicated number of CD4<sup>+</sup> T cells. In macaques R06-037, R05-005, R07-001, and R07-006 at 2 years indicated by the asterisk (\*), cellular DNAs were extracted after 8 days of culture. The cell numbers are different among samples because of difference in available cell numbers.
